# Supplementary material for: Insights into the Possible Molecular Mechanisms of Resistance to PARP Inhibitors
Source: MDPI journal article supplement (doi:10.3390/cancers14112804), 2022-06-05
Supplement: s1 [file s1]

**Table S1. Ongoing (Recruiting and Active not recruiting) clinical trials investigating the combination of PARPi with immunotherapies and other agents (all accessed on 2 June 2022).**

|   | Title                                                                                                                             | Status                 | Study Results        | Conditions                                                                                                                                                               | Interventions                                                                                                                                                                                  |
|---|-----------------------------------------------------------------------------------------------------------------------------------|------------------------|----------------------|--------------------------------------------------------------------------------------------------------------------------------------------------------------------------|------------------------------------------------------------------------------------------------------------------------------------------------------------------------------------------------|
| 1 | <a href="#">Study of CYH33 in Combination With Olaparib an Oral PARP Inhibitor in Patients With Advanced Solid Tumors.</a>        | Recruiting             | No Results Available | <ul style="list-style-type: none"> <li>•Ovarian Cancer</li> <li>•Breast Cancer</li> <li>•Solid Tumor</li> <li>•Prostate Cancer</li> <li>•Endometrial Cancer</li> </ul>   | •Drug: CYH33                                                                                                                                                                                   |
| 2 | <a href="#">Combination ATR and PARP Inhibitor (CAPRI) Trial With AZD6738 and Olaparib in Recurrent Ovarian Cancer</a>            | Recruiting             | No Results Available | •High Grade Serous Carcinoma                                                                                                                                             | <ul style="list-style-type: none"> <li>•Drug: Olaparib Pill</li> <li>•Drug: AZD6738</li> </ul>                                                                                                 |
| 3 | <a href="#">PARP Inhibitor With 177Lu-DOTA-Octreotate PRRT in Patients With Neuroendocrine Tumours</a>                            | Recruiting             | No Results Available | •Neuroendocrine Tumors                                                                                                                                                   | •Drug: Talazoparib                                                                                                                                                                             |
| 4 | <a href="#">Study of RP-3500 With Niraparib or Olaparib in Advanced Solid Tumors</a>                                              | Recruiting             | No Results Available | •Advanced Solid Tumor, Adult                                                                                                                                             | •Drug: RP-3500                                                                                                                                                                                 |
| 5 | <a href="#">Study to Assess the Safety and Tolerability of a PARP Inhibitor in Combination With Carboplatin and/or Paclitaxel</a> | Active, not recruiting | No Results Available | <ul style="list-style-type: none"> <li>•Triple Negative Metastatic Breast Cancer</li> <li>•Advanced Ovarian Cancer</li> <li>•Carboplatin</li> <li>•Paclitaxel</li> </ul> | <ul style="list-style-type: none"> <li>•Drug: KU-0059436 (AZD2281) (PARP inhibitor)</li> <li>•Drug: Carboplatin</li> <li>•Drug: Paclitaxel</li> <li>•Drug: Paclitaxel + Carboplatin</li> </ul> |
| 6 | <a href="#">EP0057 in Combination With Olaparib in Advanced Ovarian Cancer</a>                                                    | Recruiting             | No Results Available | •Ovarian Cancer                                                                                                                                                          | <ul style="list-style-type: none"> <li>•Drug: EP0057</li> <li>•Drug: Olaparib tablets</li> </ul>                                                                                               |
| 7 | <a href="#">A Study of AK112 Combined With PARP Inhibitor in the Treatment of Recurrent Ovarian Cancer</a>                        | Recruiting             | No Results Available | <ul style="list-style-type: none"> <li>•Ovarian Neoplasms</li> <li>•Recurrent Ovarian Carcinoma</li> <li>•Relapsed Ovarian Cancer</li> <li>•Ovarian Cancer</li> </ul>    | <ul style="list-style-type: none"> <li>•Drug: AK112 low dose</li> <li>•Drug: AK112 medium dose</li> <li>•Drug: AK112 high dose</li> </ul>                                                      |
| 8 | <a href="#">Study to Evaluate IMP9064 as a Monotherapy or in Combination in Patients With Advanced Solid Tumors</a>               | Recruiting             | No Results Available | <ul style="list-style-type: none"> <li>•Solid Tumor</li> <li>•Advanced Solid Tumor</li> </ul>                                                                            | •Drug: IMP9064                                                                                                                                                                                 |

|    | Title                                                                                                                                                                                                | Status                 | Study Results        | Conditions                                                                                                                                                                                                                                                                                                                                                                                                                                                       | Interventions                                                                                              |
|----|------------------------------------------------------------------------------------------------------------------------------------------------------------------------------------------------------|------------------------|----------------------|------------------------------------------------------------------------------------------------------------------------------------------------------------------------------------------------------------------------------------------------------------------------------------------------------------------------------------------------------------------------------------------------------------------------------------------------------------------|------------------------------------------------------------------------------------------------------------|
| 9  | <a href="#">A Phase II Clinical Trial Evaluating the Combination of Olaparib and Temozolomide for the Treatment of Advanced Uterine Leiomyosarcoma</a>                                               | Active, not recruiting | No Results Available | <ul style="list-style-type: none"> <li>•Stage III Uterine Corpus Leiomyosarcoma AJCC v8</li> <li>•Stage IIIA Uterine Corpus Leiomyosarcoma AJCC v8</li> <li>•Stage IIIB Uterine Corpus Leiomyosarcoma AJCC v8</li> <li>•Stage IIIC Uterine Corpus Leiomyosarcoma AJCC v8</li> <li>•Stage IV Uterine Corpus Leiomyosarcoma AJCC v8</li> <li>•Stage IVA Uterine Corpus Leiomyosarcoma AJCC v8</li> <li>•Stage IVB Uterine Corpus Leiomyosarcoma AJCC v8</li> </ul> | <ul style="list-style-type: none"> <li>•Drug: Olaparib</li> <li>•Drug: Temozolomide</li> </ul>             |
| 10 | <a href="#">Efficacy and Safety of the Combination of Rucaparib (PARP Inhibitor) and Atezolizumab (Anti-PD-L1 Antibody) in Patients With DNA Repair-deficient or Platinum-sensitive Solid Tumors</a> | Recruiting             | No Results Available | •Solid Tumor                                                                                                                                                                                                                                                                                                                                                                                                                                                     | <ul style="list-style-type: none"> <li>•Drug: Atezolizumab</li> <li>•Drug: Rucaparib</li> </ul>            |
| 11 | <a href="#">Study to Evaluate Sacituzumab Govitecan in Combination With Talazoparib in Patients With Metastatic Breast Cancer.</a>                                                                   | Recruiting             | No Results Available | •Breast Cancer                                                                                                                                                                                                                                                                                                                                                                                                                                                   | <ul style="list-style-type: none"> <li>•Drug: Talazoparib</li> <li>•Drug: Sacituzumab Govitecan</li> </ul> |
| 12 | <a href="#">Talazoparib in Combination With Belinostat for Metastatic Breast Cancer, Metastatic Castration Resistant Prostate Cancer, and Metastatic Ovarian Cancer</a>                              | Recruiting             | No Results Available | <ul style="list-style-type: none"> <li>•Metastatic Breast Cancer</li> <li>•Metastatic Castration-resistant Prostate Cancer</li> <li>•Metastatic Ovarian Carcinoma</li> </ul>                                                                                                                                                                                                                                                                                     | <ul style="list-style-type: none"> <li>•Drug: Talazoparib</li> <li>•Drug: Belinostat</li> </ul>            |
| 13 | <a href="#">Niraparib in Combination With Trastuzumab in Metastatic HER2+ Breast Cancer</a>                                                                                                          | Recruiting             | No Results Available | <ul style="list-style-type: none"> <li>•Metastatic Breast Cancer</li> <li>•HER2 Positive Breast Carcinoma</li> </ul>                                                                                                                                                                                                                                                                                                                                             | <ul style="list-style-type: none"> <li>•Drug: Niraparib</li> <li>•Drug: Trastuzumab</li> </ul>             |
| 14 | <a href="#">Rucaparib in Combination With Nivolumab in Patients With Advanced or Metastatic Biliary Tract Cancer Following Platinum Therapy</a>                                                      | Recruiting             | No Results Available | •Biliary Tract Cancer                                                                                                                                                                                                                                                                                                                                                                                                                                            | <ul style="list-style-type: none"> <li>•Drug: Rucaparib</li> <li>•Drug: Nivolumab</li> </ul>               |
| 15 | <a href="#">Study in Patients With SCLC of Veliparib in Combination With Topotecan</a>                                                                                                               | Recruiting             | No Results Available | •Small Cell Lung Cancer SCLC                                                                                                                                                                                                                                                                                                                                                                                                                                     | <ul style="list-style-type: none"> <li>•Drug: veliparib</li> <li>•Drug: Topotecan</li> </ul>               |

|    | Title                                                                                                                                   | Status                 | Study Results        | Conditions                                                                                                                                                                                                                                                                                                                                                                                                                 | Interventions                                                                                                                                                           |
|----|-----------------------------------------------------------------------------------------------------------------------------------------|------------------------|----------------------|----------------------------------------------------------------------------------------------------------------------------------------------------------------------------------------------------------------------------------------------------------------------------------------------------------------------------------------------------------------------------------------------------------------------------|-------------------------------------------------------------------------------------------------------------------------------------------------------------------------|
| 16 | <a href="#">Study of AZD5305 as Monotherapy and in Combination With Anti-cancer Agents in Patients With Advanced Solid Malignancies</a> | Recruiting             | No Results Available | <ul style="list-style-type: none"> <li>•Ovarian Cancer</li> <li>•Breast Cancer</li> <li>•Pancreatic Cancer</li> <li>•Prostate Cancer</li> <li>•Additional Indications Below for Module 4 and 5</li> <li>•Non-small Cell Lung Cancer</li> <li>•Small Cell Lung Cancer</li> <li>•Colorectal Cancer</li> <li>•Bladder Cancer</li> <li>•Gastric Cancer</li> <li>•and 3 more</li> </ul>                                         | <ul style="list-style-type: none"> <li>•Drug: AZD5305</li> <li>•Drug: Paclitaxel</li> <li>•Drug: Carboplatin</li> <li>•Drug: T- Dxd</li> <li>•Drug: Dato-DXd</li> </ul> |
| 17 | <a href="#">ATr Inhibitor in Combination With Olaparib in Gynaecological Cancers With ARId1A Loss or no Loss</a>                        | Recruiting             | No Results Available | <ul style="list-style-type: none"> <li>•Gynaecological Cancers</li> </ul>                                                                                                                                                                                                                                                                                                                                                  | <ul style="list-style-type: none"> <li>•Drug: AZD6738</li> <li>•Drug: Olaparib</li> </ul>                                                                               |
| 18 | <a href="#">OLAParib COmbinations</a>                                                                                                   | Active, not recruiting | No Results Available | <ul style="list-style-type: none"> <li>•Cancer</li> </ul>                                                                                                                                                                                                                                                                                                                                                                  | <ul style="list-style-type: none"> <li>•Drug: AZD2281</li> <li>•Drug: AZD5363</li> <li>•Drug: AZD1775</li> <li>•Drug: AZD6738</li> </ul>                                |
| 19 | <a href="#">Anlotinib Combined With Dose-reduced Olaparib in Patients With Platinum-Sensitive Recurrent Ovarian Cancer</a>              | Recruiting             | No Results Available | <ul style="list-style-type: none"> <li>•Ovarian Cancer</li> <li>•Ovarian and Fallopian Tube Cysts and Neoplasms</li> <li>•Neoplasms by Site</li> <li>•Neoplasms</li> <li>•Genital Neoplasms, Female</li> <li>•Urogenital Neoplasms</li> <li>•Neoplasms, Glandular and Epithelial</li> <li>•Neoplasms by Histologic Type</li> <li>•Carcinoma, Ovarian Epithelial</li> <li>•Ovarian Diseases</li> <li>•and 9 more</li> </ul> | <ul style="list-style-type: none"> <li>•Drug: Anlotinib</li> <li>•Drug: Olaparib</li> </ul>                                                                             |

|    | Title                                                                                                                                                                           | Status     | Study Results        | Conditions                                                                                                                                                                         | Interventions                                                                                                                               |
|----|---------------------------------------------------------------------------------------------------------------------------------------------------------------------------------|------------|----------------------|------------------------------------------------------------------------------------------------------------------------------------------------------------------------------------|---------------------------------------------------------------------------------------------------------------------------------------------|
| 20 | <a href="#">ZEN003694 Combined With Talazoparib in Patients With Recurrent Ovarian Cancer</a>                                                                                   | Recruiting | No Results Available | <ul style="list-style-type: none"> <li>•Ovarian Cancer</li> <li>•Peritoneal Cancer</li> <li>•Fallopian Tube Cancer</li> </ul>                                                      | <ul style="list-style-type: none"> <li>•Drug: ZEN003694</li> <li>•Drug: Talazoparib</li> </ul>                                              |
| 21 | <a href="#">Pembrolizumab in Combination With Olaparib in Advanced BRCA-mutated or HDR-defect Breast Cancer</a>                                                                 | Recruiting | No Results Available | <ul style="list-style-type: none"> <li>•Breast Cancer</li> </ul>                                                                                                                   | <ul style="list-style-type: none"> <li>•Drug: Pembrolizumab</li> <li>•Drug: Olaparib</li> </ul>                                             |
| 22 | <a href="#">Pembrolizumab and Olaparib in Cervical Cancer Patients</a>                                                                                                          | Recruiting | No Results Available | <ul style="list-style-type: none"> <li>•Cervical Cancer</li> <li>•Cervical Carcinoma</li> </ul>                                                                                    | <ul style="list-style-type: none"> <li>•Drug: pembrolizumab</li> <li>•Drug: olaparib</li> </ul>                                             |
| 23 | <a href="#">Study of RP-3500 in Advanced Solid Tumors</a>                                                                                                                       | Recruiting | No Results Available | <ul style="list-style-type: none"> <li>•Advanced Solid Tumor</li> </ul>                                                                                                            | <ul style="list-style-type: none"> <li>•Drug: RP-3500</li> <li>•Drug: Talazoparib</li> <li>•Drug: Gemcitabine Injection [Gemzar]</li> </ul> |
| 24 | <a href="#">IMP4297 in Combination With Temozolomide in Patients With Advanced Solid Tumors and Small Cell Lung Cancer</a>                                                      | Recruiting | No Results Available | <ul style="list-style-type: none"> <li>•Advanced Solid Tumours</li> <li>•Small Cell Lung Cancer</li> </ul>                                                                         | <ul style="list-style-type: none"> <li>•Drug: IMP4297</li> </ul>                                                                            |
| 25 | <a href="#">Testing the Combination of the Anti-cancer Drugs Copanlisib, Olaparib, and MEDI4736 (Durvalumab) in Patients With Advanced Solid Tumors With Selected Mutations</a> | Recruiting | No Results Available | <ul style="list-style-type: none"> <li>•Advanced Malignant Solid Neoplasm</li> <li>•Metastatic Malignant Solid Neoplasm</li> <li>•Unresectable Malignant Solid Neoplasm</li> </ul> | <ul style="list-style-type: none"> <li>•Drug: Copanlisib Hydrochloride</li> <li>•Biological: Durvalumab</li> <li>•Drug: Olaparib</li> </ul> |
| 26 | <a href="#">ATR Inhibitor BAY 1895344 Plus Niraparib Phase 1b Study in Advanced Solid Tumors and Ovarian Cancer</a>                                                             | Recruiting | No Results Available | <ul style="list-style-type: none"> <li>•Advanced Solid Tumors (Excluding Prostate Cancer)</li> <li>•Ovarian Cancer</li> </ul>                                                      | <ul style="list-style-type: none"> <li>•Drug: BAY1895344</li> <li>•Drug: Niraparib</li> </ul>                                               |

|    | Title                                                                                                                                                  | Status                 | Study Results        | Conditions                                                                                                                                                                                                                                                                                                                                                                                                                                                                                                                                                                                                                                           | Interventions                                                                                                                                                                                                                                                         |
|----|--------------------------------------------------------------------------------------------------------------------------------------------------------|------------------------|----------------------|------------------------------------------------------------------------------------------------------------------------------------------------------------------------------------------------------------------------------------------------------------------------------------------------------------------------------------------------------------------------------------------------------------------------------------------------------------------------------------------------------------------------------------------------------------------------------------------------------------------------------------------------------|-----------------------------------------------------------------------------------------------------------------------------------------------------------------------------------------------------------------------------------------------------------------------|
| 27 | <a href="#">Comparison of Standard of Care Treatment With a Triplet Combination of Targeted Immunotherapeutic Agents</a>                               | Recruiting             | No Results Available | <ul style="list-style-type: none"> <li>•Fallopian Tube Mucinous Adenocarcinoma</li> <li>•Ovarian Seromucinous Carcinoma</li> <li>•Platinum-Refractory Fallopian Tube Carcinoma</li> <li>•Platinum-Refractory Ovarian Carcinoma</li> <li>•Platinum-Refractory Primary Peritoneal Carcinoma</li> <li>•Recurrent Fallopian Tube Clear Cell Adenocarcinoma</li> <li>•Recurrent Fallopian Tube Endometrioid Adenocarcinoma</li> <li>•Recurrent Fallopian Tube High Grade Serous Adenocarcinoma</li> <li>•Recurrent Fallopian Tube Mucinous Adenocarcinoma</li> <li>•Recurrent Fallopian Tube Transitional Cell Carcinoma</li> <li>•and 40 more</li> </ul> | <ul style="list-style-type: none"> <li>•Drug: Cediranib Maleate</li> <li>•Biological: Durvalumab</li> <li>•Drug: Olaparib</li> <li>•Drug: Paclitaxel</li> <li>•Drug: Pegylated Liposomal Doxorubicin Hydrochloride</li> <li>•Drug: Topotecan Hydrochloride</li> </ul> |
| 28 | <a href="#">Testing Two Oral Drugs Combination (Cediranib and Olaparib) Compared to a Single Drug (Olaparib) for Men With Advanced Prostate Cancer</a> | Active, not recruiting | No Results Available | <ul style="list-style-type: none"> <li>•Advanced Prostate Adenocarcinoma With Neuroendocrine Differentiation</li> <li>•Castration-Resistant Prostate Carcinoma</li> <li>•Metastatic Prostate Adenocarcinoma With Neuroendocrine Differentiation</li> <li>•Metastatic Prostate Carcinoma</li> <li>•Prostate Adenocarcinoma With Neuroendocrine Differentiation</li> <li>•Stage IV Prostate Adenocarcinoma AJCC v7</li> </ul>                                                                                                                                                                                                                          | <ul style="list-style-type: none"> <li>•Drug: Cediranib</li> <li>•Drug: Olaparib</li> </ul>                                                                                                                                                                           |

|    | Title                                                                                                                                                                              | Status                 | Study Results        | Conditions                                                                                                                                                                                                                                                                                                                                                     | Interventions                                                                                                               |
|----|------------------------------------------------------------------------------------------------------------------------------------------------------------------------------------|------------------------|----------------------|----------------------------------------------------------------------------------------------------------------------------------------------------------------------------------------------------------------------------------------------------------------------------------------------------------------------------------------------------------------|-----------------------------------------------------------------------------------------------------------------------------|
| 29 | <a href="#">Testing the Combination of Anti-Cancer Drugs Talazoparib and Temozolomide in Patients &gt;= 18 Years Old With Advanced Stage Rare Cancers, RARE 2 Study</a>            | Recruiting             | No Results Available | <ul style="list-style-type: none"> <li>•Adrenal Gland Pheochromocytoma</li> <li>•Hematopoietic and Lymphoid Cell Neoplasm</li> <li>•Malignant Solid Neoplasm</li> <li>•Paraganglioma</li> </ul>                                                                                                                                                                | <ul style="list-style-type: none"> <li>•Drug: Talazoparib</li> <li>•Drug: Temozolomide</li> </ul>                           |
| 30 | <a href="#">Olaparib in Combination With Vorinostat in Patients With Relapsed/Refractory and/or Metastatic Breast Cancer</a>                                                       | Recruiting             | No Results Available | <ul style="list-style-type: none"> <li>•Breast Cancer Metastatic</li> <li>•Breast Cancer</li> </ul>                                                                                                                                                                                                                                                            | <ul style="list-style-type: none"> <li>•Drug: Olaparib</li> <li>•Drug: Vorinostat</li> </ul>                                |
| 31 | <a href="#">Testing the Addition of the Anti-Cancer Drug Talazoparib to the Combination of Carboplatin and Paclitaxel for the Treatment of Advanced Cancer</a>                     | Active, not recruiting | No Results Available | <ul style="list-style-type: none"> <li>•Advanced Malignant Solid Neoplasm</li> <li>•Metastatic Malignant Solid Neoplasm</li> <li>•Unresectable Malignant Solid Neoplasm</li> </ul>                                                                                                                                                                             | <ul style="list-style-type: none"> <li>•Drug: Carboplatin</li> <li>•Drug: Paclitaxel</li> <li>•Drug: Talazoparib</li> </ul> |
| 32 | <a href="#">BGB-290 and Temozolomide in Treating Isocitrate Dehydrogenase (IDH)1/2-Mutant Grade I-IV Gliomas</a>                                                                   | Recruiting             | No Results Available | <ul style="list-style-type: none"> <li>•Glioblastoma</li> <li>•IDH1 Gene Mutation</li> <li>•IDH2 Gene Mutation</li> <li>•Low Grade Glioma</li> <li>•Malignant Glioma</li> <li>•Recurrent Glioblastoma</li> <li>•Recurrent WHO Grade II Glioma</li> <li>•Recurrent WHO Grade III Glioma</li> <li>•WHO Grade II Glioma</li> <li>•WHO Grade III Glioma</li> </ul> | <ul style="list-style-type: none"> <li>•Drug: PARP Inhibitor BGB-290</li> <li>•Drug: Temozolomide</li> </ul>                |
| 33 | <a href="#">Pulmonary Toxicities Related to PARP Inhibitors (PulmonaRIB)</a>                                                                                                       | Recruiting             | No Results Available | <ul style="list-style-type: none"> <li>•Cancer</li> </ul>                                                                                                                                                                                                                                                                                                      | <ul style="list-style-type: none"> <li>•Drug: olaparib, rucaparib, niraparib, talazoparib, veliparib, pamiparib</li> </ul>  |
| 34 | <a href="#">A Phase I/II Study of Sacituzumab Govitecan Plus Berzosertib in Small Cell Lung Cancer and Homologous Recombination-Deficient Cancers Resistant to PARP Inhibitors</a> | Recruiting             | No Results Available | <ul style="list-style-type: none"> <li>•HRD Cancer</li> <li>•SCLC</li> <li>•Advanced Solid Tumors</li> </ul>                                                                                                                                                                                                                                                   | <ul style="list-style-type: none"> <li>•Drug: Berzosertib</li> <li>•Drug: Sacituzumab Govitecan</li> </ul>                  |
| 35 | <a href="#">A Study of ZEN003694 and Talazoparib in Patients With Triple Negative Breast Cancer</a>                                                                                | Active, not recruiting | No Results Available | <ul style="list-style-type: none"> <li>•Triple Negative Breast Cancer</li> </ul>                                                                                                                                                                                                                                                                               | <ul style="list-style-type: none"> <li>•Drug: ZEN003694</li> <li>•Drug: Talazoparib</li> </ul>                              |

|    | Title                                                                                                                                                                                                                                                                         | Status                 | Study Results        | Conditions                                                                                                                                                                      | Interventions                                                                                                                                                             |
|----|-------------------------------------------------------------------------------------------------------------------------------------------------------------------------------------------------------------------------------------------------------------------------------|------------------------|----------------------|---------------------------------------------------------------------------------------------------------------------------------------------------------------------------------|---------------------------------------------------------------------------------------------------------------------------------------------------------------------------|
| 36 | <a href="#">177Lu-DOTA-TATE and Olaparib in Somatostatin Receptor Positive Tumours</a>                                                                                                                                                                                        | Recruiting             | No Results Available | <ul style="list-style-type: none"> <li>•Clinical Trial, Phase I</li> <li>•Neuroendocrine Tumors</li> <li>•Thymoma</li> <li>•Mesothelioma</li> </ul>                             | <ul style="list-style-type: none"> <li>•Drug: 177Lu-DOTA-TATE + olaparib</li> </ul>                                                                                       |
| 37 | <a href="#">Phase I/II Study of the Anti-Programmed Death Ligand-1 Durvalumab Antibody (MEDI4736) in Combination With Olaparib and/or Cediranib for Advanced Solid Tumors and Advanced or Recurrent Ovarian, Triple Negative Breast, Lung, Prostate and Colorectal Can...</a> | Recruiting             | No Results Available | <ul style="list-style-type: none"> <li>•Colorectal Neoplasms</li> <li>•Breast Neoplasms</li> </ul>                                                                              | <ul style="list-style-type: none"> <li>•Drug: Olaparib</li> <li>•Drug: Cediranib</li> <li>•Drug: Durvalumab</li> </ul>                                                    |
| 38 | <a href="#">A Trial of Pamiparib With Tislelizumab in Patients With Advanced Tumours With Homologous Recombination Repair Defects</a>                                                                                                                                         | Recruiting             | No Results Available | <ul style="list-style-type: none"> <li>•Cancer</li> </ul>                                                                                                                       | <ul style="list-style-type: none"> <li>•Drug: Pamiparib</li> <li>•Drug: Tislelizumab</li> </ul>                                                                           |
| 39 | <a href="#">PLX038 (PEGylated SN38) and Rucaparib in Solid Tumors and Small Cell Cancers</a>                                                                                                                                                                                  | Recruiting             | No Results Available | <ul style="list-style-type: none"> <li>•Small Cell Lung Cancer</li> <li>•Extra-Pulmonary Small Cell Carcinomas</li> </ul>                                                       | <ul style="list-style-type: none"> <li>•Drug: PLX038</li> <li>•Drug: Rucaparib</li> </ul>                                                                                 |
| 40 | <a href="#">PARP-inhibition and CTLA-4 Blockade in BRCA-deficient Ovarian Cancer</a>                                                                                                                                                                                          | Active, not recruiting | No Results Available | <ul style="list-style-type: none"> <li>•Ovarian Cancer</li> <li>•Fallopian Tube Cancer</li> <li>•Peritoneal Neoplasms</li> </ul>                                                | <ul style="list-style-type: none"> <li>•Drug: Olaparib</li> <li>•Drug: Tremelimumab</li> </ul>                                                                            |
| 41 | <a href="#">Talazoparib and Palbociclib, Axitinib, or Crizotinib for the Treatment of Advanced or Metastatic Solid Tumors, TalaCom Trial</a>                                                                                                                                  | Recruiting             | No Results Available | <ul style="list-style-type: none"> <li>•Advanced Malignant Solid Neoplasm</li> <li>•Metastatic Malignant Solid Neoplasm</li> <li>•Recurrent Malignant Solid Neoplasm</li> </ul> | <ul style="list-style-type: none"> <li>•Drug: Axitinib</li> <li>•Drug: Crizotinib</li> <li>•Drug: Palbociclib Isethionate</li> <li>•Drug: Talazoparib Tosylate</li> </ul> |

|    | Title                                                                                                           | Status                 | Study Results        | Conditions                                                                                                                                                                                                                                                                                                                                                                                                                                                                                                                                                                                                                                                                                                                             | Interventions                                                                                                                                                                         |
|----|-----------------------------------------------------------------------------------------------------------------|------------------------|----------------------|----------------------------------------------------------------------------------------------------------------------------------------------------------------------------------------------------------------------------------------------------------------------------------------------------------------------------------------------------------------------------------------------------------------------------------------------------------------------------------------------------------------------------------------------------------------------------------------------------------------------------------------------------------------------------------------------------------------------------------------|---------------------------------------------------------------------------------------------------------------------------------------------------------------------------------------|
| 42 | <a href="#">Veliparib and Temozolomide in Treating Patients With Acute Leukemia</a>                             | Active, not recruiting | No Results Available | <ul style="list-style-type: none"> <li>•Acute Lymphoblastic Leukemia</li> <li>•Acute Myeloid Leukemia</li> <li>•Acute Myeloid Leukemia Arising From Previous Myelodysplastic Syndrome</li> <li>•Adult Acute Myeloid Leukemia With Inv(16)(p13.1;q22); CBFB-MYH11</li> <li>•Adult Acute Myeloid Leukemia With t(16;16)(p13.1;q22); CBFB-MYH11</li> <li>•Adult Acute Myeloid Leukemia With t(8;21); (q22; q22.1); RUNX1-RUNX1T1</li> <li>•Adult Acute Myeloid Leukemia With t(9;11)(p21.3;q23.3); MLLT3-MLL</li> <li>•Adult Acute Promyelocytic Leukemia With PML-RARA</li> <li>•Adult B Acute Lymphoblastic Leukemia</li> <li>•Adult B Acute Lymphoblastic Leukemia With t(9;22)(q34.1;q11.2); BCR-ABL1</li> <li>•and 6 more</li> </ul> | <ul style="list-style-type: none"> <li>•Other: Laboratory Biomarker Analysis</li> <li>•Other: Pharmacological Study</li> <li>•Drug: Temozolomide</li> <li>•Drug: Veliparib</li> </ul> |
| 43 | <a href="#">Ph I/II Study of NMS-03305293+TMZ in Adult Patients With Recurrent Glioblastoma</a>                 | Recruiting             | No Results Available | <ul style="list-style-type: none"> <li>•Glioblastoma</li> <li>•Diffuse Glioma</li> </ul>                                                                                                                                                                                                                                                                                                                                                                                                                                                                                                                                                                                                                                               | <ul style="list-style-type: none"> <li>•Drug: NMS-03305293 + TMZ</li> <li>•Drug: Lomustine</li> </ul>                                                                                 |
| 44 | <a href="#">Niraparib in Combination With Osimertinib in EGFR-Mutated Advanced Lung Cancer</a>                  | Recruiting             | No Results Available | <ul style="list-style-type: none"> <li>•Lung Cancer</li> </ul>                                                                                                                                                                                                                                                                                                                                                                                                                                                                                                                                                                                                                                                                         | <ul style="list-style-type: none"> <li>•Drug: Niraparib</li> <li>•Drug: Osimertinib</li> </ul>                                                                                        |
| 45 | <a href="#">Induction and Maintenance Treatment With PARP Inhibitor and Immunotherapy in HPV-negative HNSCC</a> | Recruiting             | No Results Available | <ul style="list-style-type: none"> <li>•Head and Neck Squamous Cell Carcinoma</li> </ul>                                                                                                                                                                                                                                                                                                                                                                                                                                                                                                                                                                                                                                               | <ul style="list-style-type: none"> <li>•Drug: Niraparib</li> </ul>                                                                                                                    |
| 46 | <a href="#">Durvalumab and Olaparib in Metastatic or Recurrent Endometrial Cancer</a>                           | Active, not recruiting | No Results Available | <ul style="list-style-type: none"> <li>•Endometrial Neoplasms</li> <li>•Uterine Neoplasms</li> <li>•Endometrium Cancer</li> </ul>                                                                                                                                                                                                                                                                                                                                                                                                                                                                                                                                                                                                      | <ul style="list-style-type: none"> <li>•Drug: PARP inhibitor and Anti-PD-L1</li> </ul>                                                                                                |



|    | Title                                                                                                                                                                                                                                                                                         | Status                 | Study Results        | Conditions                                                                                                                                                                       | Interventions                                                                                                                                                                                                         |
|----|-----------------------------------------------------------------------------------------------------------------------------------------------------------------------------------------------------------------------------------------------------------------------------------------------|------------------------|----------------------|----------------------------------------------------------------------------------------------------------------------------------------------------------------------------------|-----------------------------------------------------------------------------------------------------------------------------------------------------------------------------------------------------------------------|
| 47 | <a href="#">ABT-888 and Temozolomide for Metastatic Breast Cancer and BRCA1/2 Breast Cancer</a>                                                                                                                                                                                               | Active, not recruiting | No Results Available | <ul style="list-style-type: none"> <li>Breast Cancer</li> <li>Metastatic Breast Cancer</li> <li>BRCA1 Gene Mutation</li> <li>brca2 Gene Mutation</li> </ul>                      | <ul style="list-style-type: none"> <li>Drug: ABT-888</li> <li>Drug: temozolomide</li> </ul>                                                                                                                           |
| 48 | <a href="#">Testing Maintenance Therapy for Small Cell Lung Cancer in Patients With SLFN11 Positive Biomarker</a>                                                                                                                                                                             | Recruiting             | No Results Available | <ul style="list-style-type: none"> <li>Extensive Stage Lung Small Cell Carcinoma</li> </ul>                                                                                      | <ul style="list-style-type: none"> <li>Drug: Atezolizumab</li> <li>Drug: Talazoparib</li> </ul>                                                                                                                       |
| 49 | <a href="#">Phase II Multicenter Study of Durvalumab and Olaparib in Platinum tReated Advanced Triple Negative Breast Cancer (DORA)</a>                                                                                                                                                       | Active, not recruiting | No Results Available | <ul style="list-style-type: none"> <li>Triple Negative Breast Cancer</li> </ul>                                                                                                  | <ul style="list-style-type: none"> <li>Drug: Olaparib Oral Product</li> <li>Drug: Olaparib Oral Product in combination with Durvalumab</li> </ul>                                                                     |
| 50 | <a href="#">Recurrent Ovarian CarcinoSarcoma Anti-pd-1 Niraparib</a>                                                                                                                                                                                                                          | Recruiting             | No Results Available | <ul style="list-style-type: none"> <li>Ovarian Carcinosarcoma</li> <li>Endometrial Carcinosarcoma</li> </ul>                                                                     | <ul style="list-style-type: none"> <li>Drug: Niraparib</li> <li>Combination Product: Niraparib + TSR-042 (Dostarlimab)</li> <li>Drug: Chemotherapy Drugs</li> </ul>                                                   |
| 51 | <a href="#">Carboplatin-Paclitaxel-Bevacizumab vs Carbo-Pacli-Beva-Rucaparib vs Carbo-Pacli-Ruca, Selected According to HRD Status, in Patients With Advanced Ovarian, Primary Peritoneal and Fallopian Tube Cancer, Preceded by a Phase I Dose Escalation Study on Ruca-Beva Combination</a> | Recruiting             | No Results Available | <ul style="list-style-type: none"> <li>Advanced (Stage IIIB-C-IV) Ovarian, Primary Peritoneal and Fallopian Tube Cancer</li> </ul>                                               | <ul style="list-style-type: none"> <li>Drug: Carboplatin</li> <li>Drug: Paclitaxel</li> <li>Drug: Bevacizumab</li> <li>Drug: Rucaparib</li> </ul>                                                                     |
| 52 | <a href="#">OSE2101 Alone or in Combination With Pembrolizumab vs BSC in Patient With Platinum-sensitive Recurrent OC</a>                                                                                                                                                                     | Recruiting             | No Results Available | <ul style="list-style-type: none"> <li>Platinum-sensitive Ovarian Cancer</li> <li>Relapsed Ovarian Cancer</li> </ul>                                                             | <ul style="list-style-type: none"> <li>Drug: OSE2101</li> <li>Drug: Pembrolizumab 25 MG/ML [Keytruda]</li> </ul>                                                                                                      |
| 53 | <a href="#">Surgery and Niraparib in Secondary Recurrent Ovarian Cancer (SOC-3 Trial)</a>                                                                                                                                                                                                     | Recruiting             | No Results Available | <ul style="list-style-type: none"> <li>Ovarian Cancer Recurrent</li> <li>Fallopian Tube Cancer</li> <li>Primary Peritoneal Carcinoma</li> </ul>                                  | <ul style="list-style-type: none"> <li>Procedure: Surgery</li> <li>Drug: carboplatin/taxane, carboplatin/gemcitabine, cisplatin/gemcitabine, liposome doxorubicin/ carboplatin...</li> <li>Drug: Niraparib</li> </ul> |
| 54 | <a href="#">Testing the Safety of Different Doses of Olaparib Given Radium-223 for Men With Advanced Prostate Cancer With Bone Metastasis</a>                                                                                                                                                 | Recruiting             | No Results Available | <ul style="list-style-type: none"> <li>Castration-Resistant Prostate Carcinoma</li> <li>Metastatic Prostate Adenocarcinoma</li> <li>Stage IVB Prostate Cancer AJCC v8</li> </ul> | <ul style="list-style-type: none"> <li>Other: Laboratory Biomarker Analysis</li> <li>Drug: Olaparib</li> <li>Other: Quality-of-Life Assessment</li> <li>Radiation: Radium Ra 223 Dichloride</li> </ul>                |

|    | Title                                                                                                                                                                                                                             | Status                 | Study Results        | Conditions                                                                                                                                                                                                                                                                                                                       | Interventions                                                                                                                                      |
|----|-----------------------------------------------------------------------------------------------------------------------------------------------------------------------------------------------------------------------------------|------------------------|----------------------|----------------------------------------------------------------------------------------------------------------------------------------------------------------------------------------------------------------------------------------------------------------------------------------------------------------------------------|----------------------------------------------------------------------------------------------------------------------------------------------------|
| 55 | <a href="#">A Phase 3 Randomized, Placebo-controlled Trial of Carboplatin and Paclitaxel With or Without Veliparib (ABT-888) in HER2-negative Metastatic or Locally Advanced Unresectable BRCA-associated Breast Cancer</a>       | Active, not recruiting | Has Results          | •Metastatic Breast Cancer                                                                                                                                                                                                                                                                                                        | •Drug: Veliparib Placebo<br>•Drug: Veliparib<br>•Drug: Carboplatin<br>•Drug: Paclitaxel                                                            |
| 56 | <a href="#">Decitabine and Talazoparib in Untreated AML and R/R AML</a>                                                                                                                                                           | Active, not recruiting | No Results Available | •Acute Myeloid Leukemia                                                                                                                                                                                                                                                                                                          | •Drug: Decitabine<br>•Drug: talazoparib                                                                                                            |
| 57 | <a href="#">A Phase 2 Trial of Fluzoparib Combined With Apatinib Versus Fluzoparib Monotherapy in Treatment With Relapsed Ovarian Cancer Patients</a>                                                                             | Recruiting             | No Results Available | •Relapsed Ovarian Cancer                                                                                                                                                                                                                                                                                                         | •Drug: Fluzoparib+Apatinib<br>•Drug: Fluzoparib                                                                                                    |
| 58 | <a href="#">A Study to Evaluate the Efficacy and Safety of Novel Treatment Combinations in Participants With Ovarian Cancer</a>                                                                                                   | Recruiting             | No Results Available | •Ovarian Neoplasms                                                                                                                                                                                                                                                                                                               | •Drug: Niraparib<br>•Biological: TSR-042<br>•Biological: Bevacizumab<br>•Drug: Carboplatin<br>•Drug: Paclitaxel                                    |
| 59 | <a href="#">Niraparib, Temozolomide and Atezolizumab in Treating Patients With Advanced Solid Tumors and Extensive-Stage Small Cell Lung Cancer With a Complete or Partial Response to Platinum-Based First-Line Chemotherapy</a> | Recruiting             | No Results Available | •Advanced Malignant Solid Neoplasm<br>•Extensive Stage Lung Small Cell Carcinoma<br>•Stage III Lung Cancer AJCC v8<br>•Stage IIIA Lung Cancer AJCC v8<br>•Stage IIIB Lung Cancer AJCC v8<br>•Stage IIIC Lung Cancer AJCC v8<br>•Stage IV Lung Cancer AJCC v8<br>•Stage IVA Lung Cancer AJCC v8<br>•Stage IVB Lung Cancer AJCC v8 | •Biological: Atezolizumab<br>•Drug: Niraparib<br>•Other: Quality-of-Life Assessment<br>•Other: Questionnaire Administration<br>•Drug: Temozolomide |
| 60 | <a href="#">Radiation, Immunotherapy and PARP Inhibitor in Triple Negative Breast Cancer</a>                                                                                                                                      | Recruiting             | No Results Available | •Breast Cancer<br>•Triple Negative Breast Cancer                                                                                                                                                                                                                                                                                 | •Drug: Niraparib<br>•Drug: Dostarlimab<br>•Radiation: Radiation therapy                                                                            |
| 61 | <a href="#">Phase I/IIa Study of Concomitant Radiotherapy With Olaparib and Temozolomide in Unresectable High Grade Gliomas Patients</a>                                                                                          | Recruiting             | No Results Available | •Malignant Gliomas<br>•Radiotherapy<br>•PARP Inhibitor                                                                                                                                                                                                                                                                           | •Drug: Olaparib<br>•Drug: Temozolomide (TMZ)<br>•Radiation: IMRT (Intensity Modulated Radiation Therapy)                                           |

|    | Title                                                                                                                                                                                                                                 | Status                 | Study Results        | Conditions                                                                                                                                                                                                                                                                                                                                                                                                                                                                                                                                                                  | Interventions                                                                                                                                                   |
|----|---------------------------------------------------------------------------------------------------------------------------------------------------------------------------------------------------------------------------------------|------------------------|----------------------|-----------------------------------------------------------------------------------------------------------------------------------------------------------------------------------------------------------------------------------------------------------------------------------------------------------------------------------------------------------------------------------------------------------------------------------------------------------------------------------------------------------------------------------------------------------------------------|-----------------------------------------------------------------------------------------------------------------------------------------------------------------|
| 62 | <a href="#">Abemaciclib and Niraparib Before Surgery for the Treatment of Hormone Receptor Positive HER2 Negative Breast Cancer</a>                                                                                                   | Recruiting             | No Results Available | <ul style="list-style-type: none"> <li>•Anatomic Stage I Breast Cancer AJCC v8</li> <li>•Anatomic Stage IA Breast Cancer AJCC v8</li> <li>•Anatomic Stage IB Breast Cancer AJCC v8</li> <li>•Anatomic Stage II Breast Cancer AJCC v8</li> <li>•Anatomic Stage IIA Breast Cancer AJCC v8</li> <li>•Anatomic Stage IIB Breast Cancer AJCC v8</li> <li>•Anatomic Stage IIIA Breast Cancer AJCC v8</li> <li>•HER2 Negative Breast Adenocarcinoma</li> <li>•Hormone Receptor Positive Breast Adenocarcinoma</li> <li>•Invasive Breast Carcinoma</li> <li>•and 10 more</li> </ul> | <ul style="list-style-type: none"> <li>•Drug: Abemaciclib</li> <li>•Drug: Niraparib Tosylate Monohydrate</li> </ul>                                             |
| 63 | <a href="#">Veliparib With Carboplatin and Paclitaxel and as Continuation Maintenance Therapy in Adults With Newly Diagnosed Stage III or IV, High-grade Serous, Epithelial Ovarian, Fallopian Tube, or Primary Peritoneal Cancer</a> | Active, not recruiting | Has Results          | <ul style="list-style-type: none"> <li>•Ovarian Cancer</li> <li>•Ovarian Neoplasm</li> </ul>                                                                                                                                                                                                                                                                                                                                                                                                                                                                                | <ul style="list-style-type: none"> <li>•Drug: Veliparib</li> <li>•Drug: Paclitaxel</li> <li>•Drug: Carboplatin</li> <li>•Other: Placebo to Veliparib</li> </ul> |

|    | Title                                                                                                                                                                       | Status                 | Study Results        | Conditions                                                                                                                                                                                                                                                                                                                                                                                                                                                                                                                       | Interventions                                                                                                               |
|----|-----------------------------------------------------------------------------------------------------------------------------------------------------------------------------|------------------------|----------------------|----------------------------------------------------------------------------------------------------------------------------------------------------------------------------------------------------------------------------------------------------------------------------------------------------------------------------------------------------------------------------------------------------------------------------------------------------------------------------------------------------------------------------------|-----------------------------------------------------------------------------------------------------------------------------|
| 64 | <a href="#">A Randomized Study of Olaparib or Placebo in Patients With Surgically Removed Pancreatic Cancer Who Have a BRCA1, BRCA2 or PALB2 Mutation, The APOLLO Trial</a> | Recruiting             | No Results Available | <ul style="list-style-type: none"> <li>•Pancreatic Acinar Cell Carcinoma</li> <li>•Pancreatic Adenosquamous Carcinoma</li> <li>•Pancreatic Carcinoma</li> <li>•Pancreatic Squamous Cell Carcinoma</li> <li>•Resectable Pancreatic Acinar Cell Carcinoma</li> <li>•Resectable Pancreatic Adenocarcinoma</li> <li>•Resectable Pancreatic Adenosquamous Carcinoma</li> <li>•Resectable Pancreatic Carcinoma</li> <li>•Stage 0 Pancreatic Cancer AJCC v8</li> <li>•Stage I Pancreatic Cancer AJCC v8</li> <li>•and 5 more</li> </ul> | <ul style="list-style-type: none"> <li>•Drug: Olaparib</li> <li>•Drug: Placebo Administration</li> </ul>                    |
| 65 | <a href="#">NUV-868 as Monotherapy and in Combination With Olaparib or Enzalutamide in Adult Patients With Advanced Solid Tumors</a>                                        | Recruiting             | No Results Available | <ul style="list-style-type: none"> <li>•Advanced Solid Tumor</li> <li>•Ovarian Cancer</li> <li>•Ovary Cancer</li> <li>•Cancer of Ovary</li> <li>•Cancer of the Ovary</li> <li>•Ovary Neoplasm</li> <li>•Pancreatic Cancer</li> <li>•Pancreas Cancer</li> <li>•Cancer of Pancreas</li> <li>•Cancer of the Pancreas</li> <li>•and 17 more</li> </ul>                                                                                                                                                                               | <ul style="list-style-type: none"> <li>•Drug: NUV-868</li> <li>•Drug: Olaparib</li> <li>•Drug: Enzalutamide</li> </ul>      |
| 66 | <a href="#">Study of Oral Rucaparib With Other Anticancer Agents in Metastatic Castration Resistant Prostate Cancer Patients (RAMP)</a>                                     | Active, not recruiting | No Results Available | <ul style="list-style-type: none"> <li>•Metastatic Castration Resistant Prostate Cancer</li> </ul>                                                                                                                                                                                                                                                                                                                                                                                                                               | <ul style="list-style-type: none"> <li>•Drug: Rucaparib</li> <li>•Drug: Enzalutamide</li> <li>•Drug: Abiraterone</li> </ul> |

|    | Title                                                                                                                         | Status                 | Study Results        | Conditions                                                                                                                                                                                                                                   | Interventions                                                                                                                                                        |
|----|-------------------------------------------------------------------------------------------------------------------------------|------------------------|----------------------|----------------------------------------------------------------------------------------------------------------------------------------------------------------------------------------------------------------------------------------------|----------------------------------------------------------------------------------------------------------------------------------------------------------------------|
| 67 | <a href="#">Phase II Study of Olaparib and Pembrolizumab in Advanced Melanoma With Homologous Recombination (HR) Mutation</a> | Recruiting             | No Results Available | •Metastatic Melanoma                                                                                                                                                                                                                         | •Drug: Olaparib<br>•Drug: Pembrolizumab                                                                                                                              |
| 68 | <a href="#">Targeted Agent Evaluation in Digestive Cancers in China Based on Molecular Characteristics</a>                    | Recruiting             | No Results Available | •Biliary Tract Neoplasms<br>•Gastric Cancer<br>•Esophageal Squamous Cell Carcinoma<br>•Colorectal Cancer<br>•Gastrointestinal Stromal Tumors<br>•Pancreatic Cancer<br>•Neuroendocrine Tumors<br>•Unknown Primary Cancer<br>•Digestive Cancer | •Drug: FGFR Inhibitor, IDH1 Inhibitor, HER2 Inhibitor, PARP Inhibitor, BRAF Inhibitor, MEK Inhibitor, ICIs, EGFR-TKIs, NTRK-TKI, and et. al.<br>•Drug: Other Therapy |
| 69 | <a href="#">BGB-290 and Temozolomide in Treating Patients With Recurrent Gliomas With IDH1/2 Mutations</a>                    | Active, not recruiting | No Results Available | •IDH1 Mutation<br>•IDH2 Mutation<br>•Recurrent Glioblastoma<br>•Recurrent WHO Grade II Glioma<br>•Recurrent WHO Grade III Glioma                                                                                                             | •Drug: PARP Inhibitor BGB-290<br>•Drug: Temozolomide<br>•Procedure: Therapeutic Conventional Surgery                                                                 |
| 70 | <a href="#">NUVOLA TRIAL Open-label Multicentre Study</a>                                                                     | Recruiting             | No Results Available | •High Grade Serous Ovarian Cancer                                                                                                                                                                                                            | •Drug: Olaparib<br>•Drug: Paclitaxel<br>•Drug: Carboplatin                                                                                                           |

|    | Title                                                                                                                                                                                                             | Status                 | Study Results        | Conditions                                                                                                                                                                                                                                                                                                                                                                                                                                                                                                         | Interventions                                                                                                                                              |
|----|-------------------------------------------------------------------------------------------------------------------------------------------------------------------------------------------------------------------|------------------------|----------------------|--------------------------------------------------------------------------------------------------------------------------------------------------------------------------------------------------------------------------------------------------------------------------------------------------------------------------------------------------------------------------------------------------------------------------------------------------------------------------------------------------------------------|------------------------------------------------------------------------------------------------------------------------------------------------------------|
| 71 | <a href="#">Cediranib Maleate and Olaparib in Treating Patients With Recurrent Ovarian, Fallopian Tube, or Peritoneal Cancer or Recurrent Triple-Negative Breast Cancer</a>                                       | Active, not recruiting | Has Results          | <ul style="list-style-type: none"> <li>•Ovarian Endometrioid Adenocarcinoma</li> <li>•Ovarian High Grade Serous Adenocarcinoma</li> <li>•Ovarian Serous Adenocarcinoma</li> <li>•Ovarian Serous Surface Papillary Adenocarcinoma</li> <li>•Primary Peritoneal Serous Adenocarcinoma</li> <li>•Recurrent Breast Carcinoma</li> <li>•Recurrent Fallopian Tube Carcinoma</li> <li>•Recurrent Ovarian Carcinoma</li> <li>•Recurrent Primary Peritoneal Carcinoma</li> <li>•Triple-Negative Breast Carcinoma</li> </ul> | <ul style="list-style-type: none"> <li>•Drug: Cediranib Maleate</li> <li>•Drug: Olaparib</li> </ul>                                                        |
| 72 | <a href="#">Testing the Combination of DS-8201a and Olaparib in HER2-Expressing Cancers With Expansion in Patients With Endometrial Cancer</a>                                                                    | Recruiting             | No Results Available | <ul style="list-style-type: none"> <li>•Endometrial Serous Adenocarcinoma</li> <li>•Metastatic Malignant Solid Neoplasm</li> <li>•Unresectable Malignant Solid Neoplasm</li> </ul>                                                                                                                                                                                                                                                                                                                                 | <ul style="list-style-type: none"> <li>•Drug: Olaparib</li> <li>•Biological: Trastuzumab Deruxtecan</li> </ul>                                             |
| 73 | <a href="#">Talazoparib - Carboplatin for Recurrent High-grade Glioma With DDRd</a>                                                                                                                               | Recruiting             | No Results Available | <ul style="list-style-type: none"> <li>•Recurrent Glioma</li> <li>•Recurrent Glioblastoma</li> <li>•Poly ADP Ribose Polymerase (PARP) Inhibitor</li> <li>•PTEN Gene Inactivation</li> <li>•IDH Mutation</li> </ul>                                                                                                                                                                                                                                                                                                 | <ul style="list-style-type: none"> <li>•Drug: Talazoparib</li> </ul>                                                                                       |
| 74 | <a href="#">Study to Compare the Efficacy and Safety of Olaparib When Given in Combination With Carboplatin and Paclitaxel, Compared With Carboplatin and Paclitaxel in Patients With Advanced Ovarian Cancer</a> | Active, not recruiting | Has Results          | <ul style="list-style-type: none"> <li>•Ovarian Cancer</li> </ul>                                                                                                                                                                                                                                                                                                                                                                                                                                                  | <ul style="list-style-type: none"> <li>•Drug: olaparib</li> <li>•Drug: paclitaxel</li> <li>•Drug: carboplatin</li> <li>•Drug: Drug: carboplatin</li> </ul> |

|    | Title                                                                                                                                                                                      | Status                 | Study Results        | Conditions                                                                                                                                                                                                                                                                       | Interventions                                                                                                                                                                                   |
|----|--------------------------------------------------------------------------------------------------------------------------------------------------------------------------------------------|------------------------|----------------------|----------------------------------------------------------------------------------------------------------------------------------------------------------------------------------------------------------------------------------------------------------------------------------|-------------------------------------------------------------------------------------------------------------------------------------------------------------------------------------------------|
| 75 | <a href="#">Olaparib, Durvalumab, and Tremelimumab in Treating Patients With Recurrent or Refractory Ovarian, Fallopian Tube or Primary Peritoneal Cancer With BRCA1 or BRCA2 Mutation</a> | Active, not recruiting | No Results Available | <ul style="list-style-type: none"> <li>•BRCA1 Gene Mutation</li> <li>•BRCA2 Gene Mutation</li> <li>•Ovarian Serous Adenocarcinoma</li> <li>•Recurrent Fallopian Tube Carcinoma</li> <li>•Recurrent Ovarian Carcinoma</li> <li>•Recurrent Primary Peritoneal Carcinoma</li> </ul> | <ul style="list-style-type: none"> <li>•Biological: Durvalumab</li> <li>•Other: Laboratory Biomarker Analysis</li> <li>•Drug: Olaparib</li> <li>•Biological: Tremelimumab</li> </ul>            |
| 76 | <a href="#">M1774 in Participants With Metastatic or Locally Advanced Unresectable Solid Tumors (DDRiver Solid Tumors 301)</a>                                                             | Recruiting             | No Results Available | <ul style="list-style-type: none"> <li>•Metastatic or Locally Advanced Unresectable Solid Tumors</li> </ul>                                                                                                                                                                      | <ul style="list-style-type: none"> <li>•Drug: M1774</li> <li>•Drug: Niraparib</li> </ul>                                                                                                        |
| 77 | <a href="#">Olaparib and Durvalumab With Carboplatin, Etoposide, and/or Radiation Therapy for the Treatment of Extensive-Stage Small Cell Lung Cancer, PRIO Trial</a>                      | Recruiting             | No Results Available | <ul style="list-style-type: none"> <li>•Extensive Stage Lung Small Cell Carcinoma</li> <li>•Stage IV Lung Cancer AJCC v8</li> <li>•Stage IVA Lung Cancer AJCC v8</li> <li>•Stage IVB Lung Cancer AJCC v8</li> </ul>                                                              | <ul style="list-style-type: none"> <li>•Drug: Carboplatin</li> <li>•Biological: Durvalumab</li> <li>•Drug: Etoposide</li> <li>•Drug: Olaparib</li> <li>•Radiation: Radiation Therapy</li> </ul> |
| 78 | <a href="#">Olaparib and Radiotherapy in Head and Neck Cancer</a>                                                                                                                          | Active, not recruiting | No Results Available | <ul style="list-style-type: none"> <li>•Laryngeal Cancer Stage II</li> <li>•Laryngeal Cancer Stage III</li> <li>•Carcinoma, Squamous Cell</li> <li>•Head and Neck Neoplasms</li> </ul>                                                                                           | <ul style="list-style-type: none"> <li>•Radiation: radiotherapy</li> <li>•Drug: Olaparib</li> </ul>                                                                                             |
| 79 | <a href="#">A Study of ART4215 for the Treatment of Advanced or Metastatic Solid Tumors</a>                                                                                                | Recruiting             | No Results Available | <ul style="list-style-type: none"> <li>•Advanced Cancer</li> <li>•Metastatic Cancer</li> <li>•Breast Cancer</li> </ul>                                                                                                                                                           | <ul style="list-style-type: none"> <li>•Drug: ART4215</li> <li>•Drug: Talazoparib</li> <li>•Drug: Niraparib</li> </ul>                                                                          |
| 80 | <a href="#">Trial of EP0057, a Nanoparticle Camptothecin With Olaparib in People With Relapsed/Refractory Small Cell Lung Cancer</a>                                                       | Recruiting             | No Results Available | <ul style="list-style-type: none"> <li>•Urothelial Carcinoma</li> <li>•Urothelial Cancer</li> <li>•Lung Neoplasms</li> <li>•Small Cell Lung Cancer</li> <li>•Prostate Cancer</li> </ul>                                                                                          | <ul style="list-style-type: none"> <li>•Drug: EP0057</li> <li>•Drug: olaparib</li> </ul>                                                                                                        |

|    | Title                                                                                                                                                | Status                 | Study Results        | Conditions                                                                                                                                                                                                                                                                                                                                                                                                                                                               | Interventions                                                                                                                                                                |
|----|------------------------------------------------------------------------------------------------------------------------------------------------------|------------------------|----------------------|--------------------------------------------------------------------------------------------------------------------------------------------------------------------------------------------------------------------------------------------------------------------------------------------------------------------------------------------------------------------------------------------------------------------------------------------------------------------------|------------------------------------------------------------------------------------------------------------------------------------------------------------------------------|
| 81 | <a href="#">Study of Onivyde With Talazoparib or Temozolomide in Children With Recurrent Solid Tumors and Ewing Sarcoma</a>                          | Active, not recruiting | No Results Available | <ul style="list-style-type: none"> <li>•Recurrent Solid Tumor</li> <li>•Recurrent Ewing Sarcoma</li> <li>•Recurrent Hepatoblastoma</li> <li>•Recurrent Malignant Germ Cell Tumor</li> <li>•Recurrent Malignant Solid Neoplasm</li> <li>•Recurrent Neuroblastoma</li> <li>•Recurrent Osteosarcoma</li> <li>•Recurrent Peripheral Primitive Neuroectodermal Tumor</li> <li>•Recurrent Rhabdoid Tumor</li> <li>•Recurrent Rhabdomyosarcoma</li> <li>•and 12 more</li> </ul> | <ul style="list-style-type: none"> <li>•Drug: Onivyde</li> <li>•Drug: Talazoparib</li> <li>•Drug: Temozolomide</li> </ul>                                                    |
| 82 | <a href="#">Study Evaluating the Efficacy of Maintenance Olaparib and Cediranib or Olaparib Alone in Ovarian Cancer Patients</a>                     | Recruiting             | No Results Available | •Ovarian Cancer                                                                                                                                                                                                                                                                                                                                                                                                                                                          | <ul style="list-style-type: none"> <li>•Drug: Olaparib</li> <li>•Drug: Cediranib</li> </ul>                                                                                  |
| 83 | <a href="#">Study of Talazoparib With Enzalutamide in Men With DDR Gene Mutated mCSPC</a>                                                            | Recruiting             | No Results Available | •Prostate Cancer                                                                                                                                                                                                                                                                                                                                                                                                                                                         | <ul style="list-style-type: none"> <li>•Drug: talazoparib plus enzalutamide</li> <li>•Drug: Placebo plus enzalutamide</li> </ul>                                             |
| 84 | <a href="#">Efficacy Study of Olaparib With Paclitaxel Versus Paclitaxel in Gastric Cancer Patients</a>                                              | Active, not recruiting | Has Results          | •Gastric Cancer                                                                                                                                                                                                                                                                                                                                                                                                                                                          | <ul style="list-style-type: none"> <li>•Drug: olaparib</li> <li>•Drug: paclitaxel</li> <li>•Drug: Placebo</li> </ul>                                                         |
| 85 | <a href="#">Alpelisib Plus Olaparib in Platinum-resistant/ Refractory, High-grade Serous Ovarian Cancer, With no Germline BRCA Mutation Detected</a> | Recruiting             | No Results Available | •Ovarian Cancer                                                                                                                                                                                                                                                                                                                                                                                                                                                          | <ul style="list-style-type: none"> <li>•Drug: Alpelisib</li> <li>•Drug: Olaparib</li> <li>•Drug: Paclitaxel</li> <li>•Drug: Pegylated liposomal doxorubicin (PLD)</li> </ul> |



|    | Title                                                                                                                               | Status                 | Study Results        | Conditions                                                                                                                                                                                                                                                                                                                                                                                                                                                                                                                                                              | Interventions                                                                                                                                                                                                                                |
|----|-------------------------------------------------------------------------------------------------------------------------------------|------------------------|----------------------|-------------------------------------------------------------------------------------------------------------------------------------------------------------------------------------------------------------------------------------------------------------------------------------------------------------------------------------------------------------------------------------------------------------------------------------------------------------------------------------------------------------------------------------------------------------------------|----------------------------------------------------------------------------------------------------------------------------------------------------------------------------------------------------------------------------------------------|
| 86 | <a href="#">A Phase 2 Study of Cediranib in Combination With Olaparib in Advanced Solid Tumors</a>                                  | Active, not recruiting | No Results Available | <ul style="list-style-type: none"> <li>•Metastatic Lung Non-Small Cell Carcinoma</li> <li>•Metastatic Lung Small Cell Carcinoma</li> <li>•Metastatic Pancreatic Adenocarcinoma</li> <li>•Metastatic Triple-Negative Breast Carcinoma</li> <li>•Pancreatic Ductal Adenocarcinoma</li> <li>•Stage III Breast Cancer AJCC v7</li> <li>•Stage III Lung Non-Small Cell Cancer AJCC v7</li> <li>•Stage III Lung Small Cell Carcinoma AJCC v7</li> <li>•Stage III Pancreatic Cancer AJCC v6 and v7</li> <li>•Stage IIIA Breast Cancer AJCC v7</li> <li>•and 15 more</li> </ul> | <ul style="list-style-type: none"> <li>•Other: 18F-Fluoromisonidazole</li> <li>•Drug: Cediranib Maleate</li> <li>•Other: Laboratory Biomarker Analysis</li> <li>•Drug: Olaparib</li> <li>•Procedure: Positron Emission Tomography</li> </ul> |
| 87 | <a href="#">Niraparib + Ipilimumab or Nivolumab in Progression Free Pancreatic Adenocarcinoma After Platinum-Based Chemotherapy</a> | Active, not recruiting | No Results Available | <ul style="list-style-type: none"> <li>•Pancreatic Adenocarcinoma</li> </ul>                                                                                                                                                                                                                                                                                                                                                                                                                                                                                            | <ul style="list-style-type: none"> <li>•Drug: Niraparib + Nivolumab</li> <li>•Drug: Niraparib + Ipilimumab</li> </ul>                                                                                                                        |
| 88 | <a href="#">Hyperthermia and Olaparib in Treating Breast Cancer Patients With Chest Wall Recurrences</a>                            | Active, not recruiting | No Results Available | <ul style="list-style-type: none"> <li>•Metastatic Malignant Neoplasm in the Chest Wall</li> <li>•Recurrent Breast Carcinoma</li> </ul>                                                                                                                                                                                                                                                                                                                                                                                                                                 | <ul style="list-style-type: none"> <li>•Drug: Olaparib</li> <li>•Procedure: Hyperthermia Treatment</li> <li>•Other: Questionnaire Administration</li> <li>•Other: Quality-of-Life Assessment</li> </ul>                                      |

|    | Title                                                                                                                                                                                  | Status                 | Study Results        | Conditions                                                                                                                                                                                                                                                                                                                                                                                                                                                                                                                                   | Interventions                                                                                                                                                                                                           |
|----|----------------------------------------------------------------------------------------------------------------------------------------------------------------------------------------|------------------------|----------------------|----------------------------------------------------------------------------------------------------------------------------------------------------------------------------------------------------------------------------------------------------------------------------------------------------------------------------------------------------------------------------------------------------------------------------------------------------------------------------------------------------------------------------------------------|-------------------------------------------------------------------------------------------------------------------------------------------------------------------------------------------------------------------------|
| 89 | <a href="#">Olaparib and Ramucirumab in Treating Patients With Metastatic or Locally Recurrent Gastric or Gastroesophageal Junction Cancer That Cannot Be Removed by Surgery</a>       | Active, not recruiting | No Results Available | <ul style="list-style-type: none"> <li>•Metastatic Esophageal Carcinoma</li> <li>•Metastatic Gastric Carcinoma</li> <li>•Metastatic Gastroesophageal Junction Adenocarcinoma</li> <li>•Recurrent Esophageal Carcinoma</li> <li>•Recurrent Gastric Carcinoma</li> <li>•Recurrent Gastroesophageal Junction Adenocarcinoma</li> <li>•Stage III Esophageal Cancer AJCC v7</li> <li>•Stage III Gastric Cancer AJCC v7</li> <li>•Stage IIIA Esophageal Cancer AJCC v7</li> <li>•Stage IIIA Gastric Cancer AJCC v7</li> <li>•and 9 more</li> </ul> | <ul style="list-style-type: none"> <li>•Drug: Olaparib</li> <li>•Biological: Ramucirumab</li> </ul>                                                                                                                     |
| 90 | <a href="#">Liposomal Irinotecan, Fluorouracil, Leucovorin Calcium, and Rucaparib in Treating Patients With Metastatic Pancreatic, Colorectal, Gastroesophageal, or Biliary Cancer</a> | Active, not recruiting | No Results Available | <ul style="list-style-type: none"> <li>•Metastatic Biliary Tract Carcinoma</li> <li>•Metastatic Colorectal Carcinoma</li> <li>•Metastatic Gastroesophageal Junction Adenocarcinoma</li> <li>•Metastatic Malignant Digestive System Neoplasm</li> <li>•Metastatic Pancreatic Adenocarcinoma</li> <li>•Stage IV Colorectal Cancer AJCC v7</li> <li>•Stage IV Pancreatic Cancer AJCC v6 and v7</li> <li>•Stage IVA Colorectal Cancer AJCC v7</li> <li>•Stage IVB Colorectal Cancer AJCC v7</li> </ul>                                           | <ul style="list-style-type: none"> <li>•Drug: Fluorouracil</li> <li>•Drug: Irinotecan Sucrosfate</li> <li>•Other: Laboratory Biomarker Analysis</li> <li>•Drug: Leucovorin Calcium</li> <li>•Drug: Rucaparib</li> </ul> |

|    | Title                                                                                                                                                                                                                                                                                                                       | Status     | Study Results        | Conditions                                                                                                                                                                                                                                                                                                                                                                           | Interventions                                                                                                                                                                                                                                                                                                                                                                                                                                             |
|----|-----------------------------------------------------------------------------------------------------------------------------------------------------------------------------------------------------------------------------------------------------------------------------------------------------------------------------|------------|----------------------|--------------------------------------------------------------------------------------------------------------------------------------------------------------------------------------------------------------------------------------------------------------------------------------------------------------------------------------------------------------------------------------|-----------------------------------------------------------------------------------------------------------------------------------------------------------------------------------------------------------------------------------------------------------------------------------------------------------------------------------------------------------------------------------------------------------------------------------------------------------|
| 91 | <a href="#">Durvalumab and Olaparib for the Treatment of Prostate Cancer in Men Predicted to Have a High Neoantigen Load</a>                                                                                                                                                                                                | Recruiting | No Results Available | <ul style="list-style-type: none"> <li>•Biochemically Recurrent Prostate Carcinoma</li> <li>•Prostate Adenocarcinoma</li> </ul>                                                                                                                                                                                                                                                      | <ul style="list-style-type: none"> <li>•Biological: Durvalumab</li> <li>•Drug: Olaparib</li> <li>•Other: Quality-of-Life Assessment</li> <li>•Other: Questionnaire Administration</li> </ul>                                                                                                                                                                                                                                                              |
| 92 | <a href="#">Olaparib and Durvalumab in Treating Patients With Metastatic Triple Negative Breast Cancer</a>                                                                                                                                                                                                                  | Recruiting | No Results Available | <ul style="list-style-type: none"> <li>•Anatomic Stage IV Breast Cancer AJCC v8</li> <li>•Metastatic Triple-Negative Breast Carcinoma</li> <li>•Prognostic Stage IV Breast Cancer AJCC v8</li> </ul>                                                                                                                                                                                 | <ul style="list-style-type: none"> <li>•Biological: Durvalumab</li> <li>•Drug: Olaparib</li> </ul>                                                                                                                                                                                                                                                                                                                                                        |
| 93 | <a href="#">Testing the Combination of Olaparib and Durvalumab, Cediranib and Durvalumab, Olaparib and Capivasertib, and Cediranib Alone in Recurrent or Refractory Endometrial Cancer Following the Earlier Phase of the Study That Tested Olaparib and Cediranib in Comparison to Cediranib Alone, and Olaparib Alone</a> | Recruiting | No Results Available | <ul style="list-style-type: none"> <li>•Endometrial Undifferentiated Carcinoma</li> <li>•Endometrioid Adenocarcinoma</li> <li>•Recurrent Endometrial Serous Adenocarcinoma</li> <li>•Recurrent Uterine Corpus Cancer</li> <li>•Stage IV Uterine Corpus Cancer AJCC v7</li> <li>•Stage IVA Uterine Corpus Cancer AJCC v7</li> <li>•Stage IVB Uterine Corpus Cancer AJCC v7</li> </ul> | <ul style="list-style-type: none"> <li>•Drug: Capivasertib</li> <li>•Drug: Cediranib</li> <li>•Drug: Cediranib Maleate</li> <li>•Biological: Durvalumab</li> <li>•Drug: Olaparib</li> </ul>                                                                                                                                                                                                                                                               |
| 94 | <a href="#">FUSCC Refractory TNBC Umbrella (FUTURE)</a>                                                                                                                                                                                                                                                                     | Recruiting | No Results Available | <ul style="list-style-type: none"> <li>•Triple-negative Breast Cancer</li> </ul>                                                                                                                                                                                                                                                                                                     | <ul style="list-style-type: none"> <li>•Drug: Pyrotinib with Capecitabine</li> <li>•Drug: AR inhibitor combined with everolimus(B1) or CDK4/6 inhibitor(B2),or EZH2 inhibitor (B4)</li> <li>•Drug: anti PD-1 with nab-paclitaxel</li> <li>•Drug: PARP inhibitor included therapy</li> <li>•Drug: BLIS with anti-VEGFR included therapy</li> <li>•Drug: MES with anti-VEGFR included therapy</li> <li>•Drug: mTOR inhibitor with nab-paclitaxel</li> </ul> |

|    | Title                                                                                                                                                                                   | Status                 | Study Results        | Conditions                                                                                                                                                                                                                                                                                                                                                                                                                                                                                                                                                     | Interventions                                                                                                                                                                                                                                                                                                                                                               |
|----|-----------------------------------------------------------------------------------------------------------------------------------------------------------------------------------------|------------------------|----------------------|----------------------------------------------------------------------------------------------------------------------------------------------------------------------------------------------------------------------------------------------------------------------------------------------------------------------------------------------------------------------------------------------------------------------------------------------------------------------------------------------------------------------------------------------------------------|-----------------------------------------------------------------------------------------------------------------------------------------------------------------------------------------------------------------------------------------------------------------------------------------------------------------------------------------------------------------------------|
| 95 | <a href="#">Talazoparib and Low-Dose Temozolomide in Treating Participants With Relapsed or Refractory Extensive-Stage Small Cell Lung Cancer</a>                                       | Active, not recruiting | No Results Available | <ul style="list-style-type: none"> <li>•Recurrent Extensive Stage Small Cell Lung Carcinoma</li> <li>•Refractory Extensive Stage Small Cell Lung Carcinoma</li> </ul>                                                                                                                                                                                                                                                                                                                                                                                          | <ul style="list-style-type: none"> <li>•Drug: Talazoparib</li> <li>•Drug: Temozolomide</li> </ul>                                                                                                                                                                                                                                                                           |
| 96 | <a href="#">Javelin Parp Medley: Avelumab Plus Talazoparib In Locally Advanced Or Metastatic Solid Tumors</a>                                                                           | Active, not recruiting | No Results Available | <ul style="list-style-type: none"> <li>•Avelumab in Combination With Talazoparib Will be Investigated in Patients With Locally Advanced (Primary or Recurrent) or Metastatic Solid Tumors</li> </ul>                                                                                                                                                                                                                                                                                                                                                           | <ul style="list-style-type: none"> <li>•Drug: Avelumab Phase 1b</li> <li>•Drug: Talazoparib Phase 1b</li> <li>•Drug: Avelumab Phase 2</li> <li>•Drug: Talazoparib Phase 2</li> </ul>                                                                                                                                                                                        |
| 97 | <a href="#">Serial Measurements of Molecular and Architectural Responses to Therapy (SMMART) PRIME Trial</a>                                                                            | Recruiting             | No Results Available | <ul style="list-style-type: none"> <li>•Accelerated Phase Chronic Myelogenous Leukemia, BCR-ABL1 Positive</li> <li>•Anatomic Stage IV Breast Cancer AJCC v8</li> <li>•Anemia</li> <li>•Ann Arbor Stage III Hodgkin Lymphoma</li> <li>•Ann Arbor Stage III Non-Hodgkin Lymphoma</li> <li>•Ann Arbor Stage IIIA Hodgkin Lymphoma</li> <li>•Ann Arbor Stage IIIB Hodgkin Lymphoma</li> <li>•Ann Arbor Stage IV Hodgkin Lymphoma</li> <li>•Ann Arbor Stage IV Non-Hodgkin Lymphoma</li> <li>•Ann Arbor Stage IVA Hodgkin Lymphoma</li> <li>•and 49 more</li> </ul> | <ul style="list-style-type: none"> <li>•Drug: Abemaciclib</li> <li>•Drug: Abiraterone</li> <li>•Drug: Afatinib</li> <li>•Biological: Bevacizumab</li> <li>•Drug: Bicalutamide</li> <li>•Procedure: Biospecimen Collection</li> <li>•Drug: Bortezomib</li> <li>•Drug: Cabazitaxel</li> <li>•Drug: Cabozantinib</li> <li>•Drug: Capecitabine</li> <li>•and 46 more</li> </ul> |
| 98 | <a href="#">A Study of Rucaparib Versus Physician's Choice of Therapy in Patients With Metastatic Castration-resistant Prostate Cancer and Homologous Recombination Gene Deficiency</a> | Active, not recruiting | No Results Available | <ul style="list-style-type: none"> <li>•Metastatic Castration Resistant Prostate Cancer</li> </ul>                                                                                                                                                                                                                                                                                                                                                                                                                                                             | <ul style="list-style-type: none"> <li>•Drug: Rucaparib</li> <li>•Drug: Abiraterone acetate or Enzalutamide or Docetaxel</li> </ul>                                                                                                                                                                                                                                         |

|     | Title                                                                                                                                                                   | Status                 | Study Results        | Conditions                                                                                                                                                                                                                                                                                                                                                                                                                                                                                                                                             | Interventions                                                                                                                                                                                                                                                                                                                          |
|-----|-------------------------------------------------------------------------------------------------------------------------------------------------------------------------|------------------------|----------------------|--------------------------------------------------------------------------------------------------------------------------------------------------------------------------------------------------------------------------------------------------------------------------------------------------------------------------------------------------------------------------------------------------------------------------------------------------------------------------------------------------------------------------------------------------------|----------------------------------------------------------------------------------------------------------------------------------------------------------------------------------------------------------------------------------------------------------------------------------------------------------------------------------------|
| 99  | <a href="#">Testing the Combination of Cediranib and Olaparib in Comparison to Each Drug Alone or Other Chemotherapy in Recurrent Platinum-Resistant Ovarian Cancer</a> | Active, not recruiting | No Results Available | <ul style="list-style-type: none"> <li>•Fallopian Tube Clear Cell Adenocarcinoma</li> <li>•Fallopian Tube Endometrioid Adenocarcinoma</li> <li>•Fallopian Tube Serous Adenocarcinoma</li> <li>•Fallopian Tube Transitional Cell Carcinoma</li> <li>•Fallopian Tube Undifferentiated Carcinoma</li> <li>•Ovarian Clear Cell Adenocarcinoma</li> <li>•Ovarian Endometrioid Adenocarcinoma</li> <li>•Ovarian Seromucinous Carcinoma</li> <li>•Ovarian Serous Adenocarcinoma</li> <li>•Ovarian Transitional Cell Carcinoma</li> <li>•and 5 more</li> </ul> | <ul style="list-style-type: none"> <li>•Drug: Cediranib</li> <li>•Drug: Cediranib Maleate</li> <li>•Drug: Olaparib</li> <li>•Drug: Paclitaxel</li> <li>•Drug: Pegylated Liposomal Doxorubicin Hydrochloride</li> <li>•Other: Questionnaire Administration</li> <li>•Drug: Topotecan</li> <li>•Drug: Topotecan Hydrochloride</li> </ul> |
| 100 | <a href="#">Paclitaxel, Pembrolizumab and Olaparib in Previously Treated Advanced Gastric Adenocarcinoma</a>                                                            | Recruiting             | No Results Available | <ul style="list-style-type: none"> <li>•Advanced Gastric Adenocarcinoma</li> </ul>                                                                                                                                                                                                                                                                                                                                                                                                                                                                     | <ul style="list-style-type: none"> <li>•Drug: Paclitaxel</li> <li>•Drug: Olaparib</li> <li>•Drug: Pembrolizumab</li> </ul>                                                                                                                                                                                                             |

11 additional studies not shown
